# Supplementary material for: Effects of microparticle composition on colony morphology and viability of encapsulated therapeutic yeast for oral delivery
Source: Royal Society of Chemistry journal article supplement (doi:10.1039/d5pm00288e), 2025-12-29
Supplement: d5pm00288e1.pdf [file d5pm00288e1.pdf]

## **Supporting Information**

### **Effects of Microparticle Composition on Colony Morphology and Viability of Encapsulated Therapeutic Yeast for Oral Delivery**

Emma Etter<sup>1</sup>, Alita Miller<sup>2</sup>, Timothy Little<sup>2</sup>, Sri Sruthi Potluru<sup>1</sup>, Srilekha Venkatraman<sup>1</sup>, Juliane Nguyen<sup>1,2\*</sup>

<sup>1</sup>Joint Department of Biomedical Engineering, University of North Carolina at Chapel Hill, Chapel Hill, NC 27599, and North Carolina State University, Raleigh, NC, 27695, USA

<sup>2</sup>Division of Pharmacoengineering and Molecular Pharmaceutics, Eshelman School of Pharmacy, University of North Carolina at Chapel Hill, Chapel Hill, NC 27599, USA

#### **\*Corresponding author**

Juliane Nguyen, PhD

Division of Pharmacoengineering and Molecular Pharmaceutics

University of North Carolina at Chapel Hill

Email: [julianen@email.unc.edu](mailto:julianen@email.unc.edu)

**Figure S1**

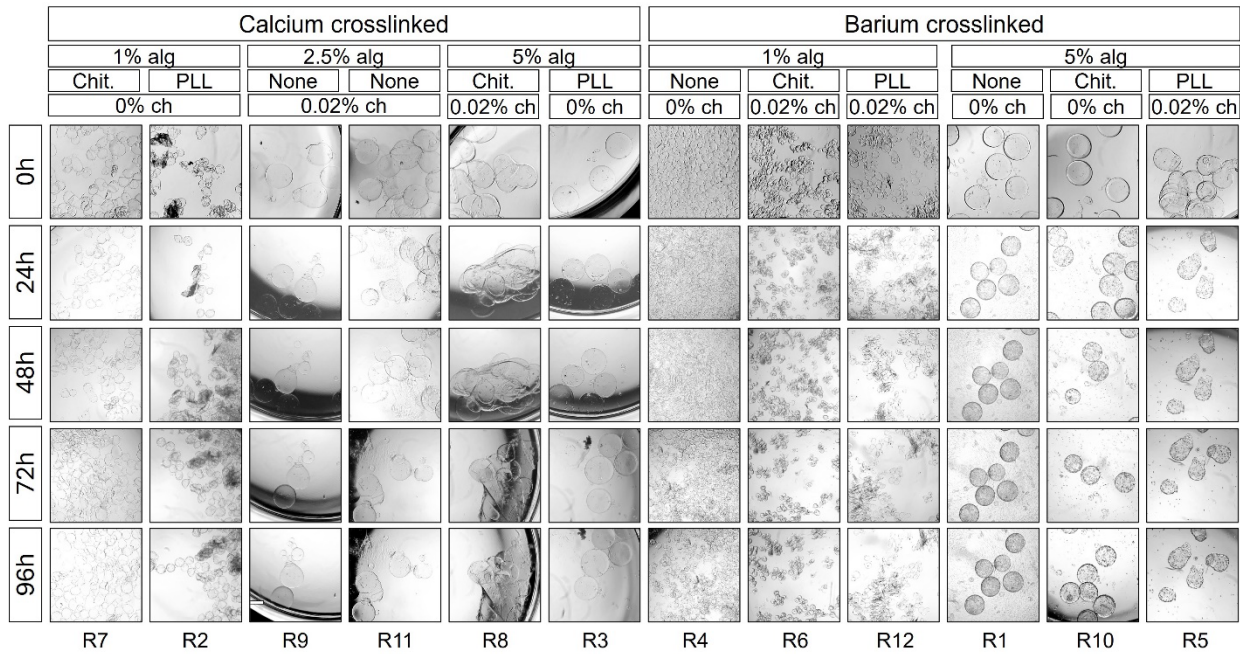

**Supplementary Fig. 1: Particle stability over time in simulated gastric fluid.** Images of particles from each run composition (R1-12) after incubation in simulated gastric fluid at 0, 24, 48, 72 and 96 hours.
